# Supplementary material for: Gestational Diabetes Mellitus: A Cross-Sectional Survey of Its Knowledge and Associated Factors among United Arab Emirates University Students
Source: MDPI journal article supplement (doi:10.3390/ijerph19148381), 2022-07-08
Supplement: s1 [file s1]

**Supplementary Table S3 showing frequency of GDM Knowledge points (0-12) among study population (480 Students)**

| <b>Total GDM Knowledge Points</b> | <b>Freq.</b> | <b>Percent</b> | <b>Cum.</b> |
|-----------------------------------|--------------|----------------|-------------|
| <b>0</b>                          | 7            | 1.46           | 1.46        |
| <b>1</b>                          | 5            | 1.04           | 2.50        |
| <b>2</b>                          | 18           | 3.75           | 6.25        |
| <b>3</b>                          | 25           | 5.21           | 11.46       |
| <b>4</b>                          | 60           | 12.50          | 23.96       |
| <b>5</b>                          | 59           | 12.29          | 36.25       |
| <b>6</b>                          | 76           | 15.83          | 52.08       |
| <b>7</b>                          | 82           | 17.08          | 69.17       |
| <b>8</b>                          | 64           | 13.33          | 82.50       |
| <b>9</b>                          | 40           | 8.33           | 90.83       |
| <b>10</b>                         | 25           | 5.21           | 96.04       |
| <b>11</b>                         | 14           | 2.92           | 98.96       |
| <b>12</b>                         | 5            | 1.04           | 100.00      |
| <b>Total</b>                      | <b>480</b>   | <b>100.00</b>  |             |
