# Supplementary material for: Gestational Diabetes Mellitus: A Cross-Sectional Survey of Its Knowledge and Associated Factors among United Arab Emirates University Students
Source: MDPI journal article supplement (doi:10.3390/ijerph19148381), 2022-07-08
Supplement: s1 [file s1]

## Assessment of GDM Knowledge and Associated Factors among University Students in the UAE – A Cross-Sectional Study

Dear Respondent,  
Please kindly fill the survey after signing the informed consent above. Thank you for your valuable time.

\* Required

### SECTION 1: SOCIODEMOGRAPHIC CHARACTERISTICS

|                                                                                                  |                                                                                                                                                                                                                                                                                                                                                                                                                                                                                                                                            |
|--------------------------------------------------------------------------------------------------|--------------------------------------------------------------------------------------------------------------------------------------------------------------------------------------------------------------------------------------------------------------------------------------------------------------------------------------------------------------------------------------------------------------------------------------------------------------------------------------------------------------------------------------------|
| Age*                                                                                             | _____                                                                                                                                                                                                                                                                                                                                                                                                                                                                                                                                      |
| Gender*                                                                                          | <input type="checkbox"/> Female<br><input type="checkbox"/> Male                                                                                                                                                                                                                                                                                                                                                                                                                                                                           |
| Emirate*                                                                                         | <input type="checkbox"/> Abu Dhabi<br><input type="checkbox"/> Dubai<br><input type="checkbox"/> Sharjah<br><input type="checkbox"/> Ajman<br><input type="checkbox"/> Ras Al Khaimah<br><input type="checkbox"/> Umm Al Quwain<br><input type="checkbox"/> Fujairah                                                                                                                                                                                                                                                                       |
| City*                                                                                            | <input type="checkbox"/> _____                                                                                                                                                                                                                                                                                                                                                                                                                                                                                                             |
| Weight                                                                                           | <input type="checkbox"/> _____                                                                                                                                                                                                                                                                                                                                                                                                                                                                                                             |
| Height                                                                                           | <input type="checkbox"/> _____                                                                                                                                                                                                                                                                                                                                                                                                                                                                                                             |
| Marital status*                                                                                  | <input type="checkbox"/> Single<br><input type="checkbox"/> Married<br><input type="checkbox"/> Divorced<br><input type="checkbox"/> Widow<br><input type="checkbox"/> Other _____                                                                                                                                                                                                                                                                                                                                                         |
| Have you (or your spouse) been pregnant before? (if applicable)<br>If yes, how many pregnancies? | <input type="checkbox"/> Yes _____<br><input type="checkbox"/> No<br><input type="checkbox"/> NA                                                                                                                                                                                                                                                                                                                                                                                                                                           |
| College*                                                                                         | <input type="checkbox"/> College of Business and Economics<br><input type="checkbox"/> College of Humanities and Social Science<br><input type="checkbox"/> College of Information Technology<br><input type="checkbox"/> College of Engineering<br><input type="checkbox"/> College of Education<br><input type="checkbox"/> College of Law<br><input type="checkbox"/> College of Agricultural and Veterinary Medicine<br><input type="checkbox"/> College of Science<br><input type="checkbox"/> College of Medicine and Health Science |
| Department*                                                                                      | <input type="checkbox"/> _____                                                                                                                                                                                                                                                                                                                                                                                                                                                                                                             |
| Program*                                                                                         | <input type="checkbox"/> Undergraduate<br><input type="checkbox"/> Post graduate                                                                                                                                                                                                                                                                                                                                                                                                                                                           |
| Are you currently working as well? *                                                             | <input type="checkbox"/> Yes<br><input type="checkbox"/> No                                                                                                                                                                                                                                                                                                                                                                                                                                                                                |
| If you are currently working, where                                                              | <input type="checkbox"/> I work in the health sector                                                                                                                                                                                                                                                                                                                                                                                                                                                                                       |

|                                                                                                                      |                                                                                                                                                                                                                                                                                                                                                                                                       |
|----------------------------------------------------------------------------------------------------------------------|-------------------------------------------------------------------------------------------------------------------------------------------------------------------------------------------------------------------------------------------------------------------------------------------------------------------------------------------------------------------------------------------------------|
| do you work?                                                                                                         | <input type="checkbox"/> I work outside the health sector<br><input type="checkbox"/> NA                                                                                                                                                                                                                                                                                                              |
| Is there anyone in your home working in the health field? *                                                          | <input type="checkbox"/> Yes _____<br><input type="checkbox"/> No                                                                                                                                                                                                                                                                                                                                     |
| Does anyone in your family have diabetes? Specify *                                                                  | <input type="checkbox"/> Yes<br><input type="checkbox"/> No                                                                                                                                                                                                                                                                                                                                           |
| Do you have any chronic diseases?                                                                                    | a. Yes<br>b. No                                                                                                                                                                                                                                                                                                                                                                                       |
| If yes specify. (You can choose more than one answer)                                                                | <input type="checkbox"/> Pre-diabetes<br><input type="checkbox"/> diabetes mellitus,<br><input type="checkbox"/> hypertension,<br><input type="checkbox"/> lipid/cholesterol abnormalities,<br><input type="checkbox"/> heart disease,<br><input type="checkbox"/> stroke,<br><input type="checkbox"/> thyroid disease,<br><input type="checkbox"/> obesity,<br><input type="checkbox"/> others _____ |
| Before now, have you ever heard what is called (gestational diabetes)? *                                             | <input type="checkbox"/> Yes<br><input type="checkbox"/> No                                                                                                                                                                                                                                                                                                                                           |
| Do you know someone who has had gestational diabetes? *                                                              | <input type="checkbox"/> Yes<br><input type="checkbox"/> No<br><input type="checkbox"/> NA                                                                                                                                                                                                                                                                                                            |
| Did you (or your spouse) have gestational diabetes during any of your pregnancies? *                                 | <input type="checkbox"/> Yes<br><input type="checkbox"/> No<br><input type="checkbox"/> NA                                                                                                                                                                                                                                                                                                            |
| <b>SECTION 2: GDM KNOWLEDGE</b>                                                                                      |                                                                                                                                                                                                                                                                                                                                                                                                       |
| Do you think that more pregnancies increase the chance of developing gestational diabetes? *                         | <input type="checkbox"/> Yes [1 point]<br><input type="checkbox"/> No<br><input type="checkbox"/> I do not know                                                                                                                                                                                                                                                                                       |
| Do you think that women who have had gestational diabetes have a greater chance of developing it again? *            | <input type="checkbox"/> Yes [1 point]<br><input type="checkbox"/> No<br><input type="checkbox"/> I do not know                                                                                                                                                                                                                                                                                       |
| Do you think that weight gain/obesity before pregnancy may contribute to gestational diabetes? *                     | <input type="checkbox"/> Yes [1 point]<br><input type="checkbox"/> No<br><input type="checkbox"/> I do not know                                                                                                                                                                                                                                                                                       |
| Do you think that a woman whose family member has diabetes has a higher chance of developing gestational diabetes? * | <input type="checkbox"/> Yes [1 point]<br><input type="checkbox"/> No<br><input type="checkbox"/> I do not know                                                                                                                                                                                                                                                                                       |
| Do you think that rapid weight gain                                                                                  | <input type="checkbox"/> Yes [1 point]                                                                                                                                                                                                                                                                                                                                                                |

|                                                                                                                        |                                                                                                                                                                                                                                                                                                                                                                                                                                                                                                                          |
|------------------------------------------------------------------------------------------------------------------------|--------------------------------------------------------------------------------------------------------------------------------------------------------------------------------------------------------------------------------------------------------------------------------------------------------------------------------------------------------------------------------------------------------------------------------------------------------------------------------------------------------------------------|
| during pregnancy may contribute to gestational diabetes? *                                                             | <input type="checkbox"/> No<br><input type="checkbox"/> I do not know                                                                                                                                                                                                                                                                                                                                                                                                                                                    |
| What is the usual time for diagnosing gestational diabetes in the absence of risk factors? *                           | <input type="checkbox"/> Week 12 – 22<br><input type="checkbox"/> Week 24 – 28 [1 point]<br><input type="checkbox"/> Week 32 – 35<br><input type="checkbox"/> I do not know                                                                                                                                                                                                                                                                                                                                              |
| What is the test (analysis) used to diagnose gestational diabetes? *                                                   | <input type="checkbox"/> Urine analysis<br><input type="checkbox"/> Blood analysis<br><input type="checkbox"/> Blood analysis after drinking glucose solution [1 point]<br><input type="checkbox"/> I do not know                                                                                                                                                                                                                                                                                                        |
| What is the treatment plan that is used for a woman with gestational diabetes? (You can choose more than one answer) * | <input type="checkbox"/> Diet and exercise [1 point]<br><input type="checkbox"/> Insulin injection OR Oral diabetes medications [1 point]<br><input type="checkbox"/> I do not know                                                                                                                                                                                                                                                                                                                                      |
| Gestational diabetes...? (You can choose more than one answer) *                                                       | <input type="checkbox"/> Usually disappears after birth [1 point]<br><input type="checkbox"/> Can affect the newborn baby if gestational diabetes is not treated [1 point]<br><input type="checkbox"/> A woman with gestational diabetes may develop Type II diabetes in the future [1 point]<br><input type="checkbox"/> I do not know                                                                                                                                                                                  |
| <b>SECTION 3: GDM KNOWLEDGE SOURCES</b>                                                                                |                                                                                                                                                                                                                                                                                                                                                                                                                                                                                                                          |
| From where/whom did you hear about GDM? (You can choose more than one answer) *                                        | <input type="checkbox"/> Hospital<br><input type="checkbox"/> Hospital staff (specify) _____<br><input type="checkbox"/> School<br><input type="checkbox"/> Workplace<br><input type="checkbox"/> TV<br><input type="checkbox"/> Newspaper/ magazines<br><input type="checkbox"/> Social media<br><input type="checkbox"/> Other online resources<br><input type="checkbox"/> Family/ friends<br><input type="checkbox"/> Neighborhood<br><input type="checkbox"/> Others (specify) _____<br><input type="checkbox"/> NA |

## Assessment of GDM Knowledge and Associated Factors among University Students in the UAE – A Cross-Sectional Study

Dear Respondent,  
Please kindly fill the survey after signing the informed consent above. Thank you for your valuable time.

\* Required

|                                                                   |                                                                                                                                                                                                                                                                                                                                                                                                       |
|-------------------------------------------------------------------|-------------------------------------------------------------------------------------------------------------------------------------------------------------------------------------------------------------------------------------------------------------------------------------------------------------------------------------------------------------------------------------------------------|
| القسم الأول: صفات وخصائص الحالة الاجتماعية                        |                                                                                                                                                                                                                                                                                                                                                                                                       |
| * العمر:                                                          | <input type="checkbox"/> _____                                                                                                                                                                                                                                                                                                                                                                        |
| * الجنس:                                                          | <input type="checkbox"/> أنثى<br><input type="checkbox"/> ذكر                                                                                                                                                                                                                                                                                                                                         |
| * المنطقة:                                                        | <input type="checkbox"/> أبو ظبي<br><input type="checkbox"/> دبي<br><input type="checkbox"/> الشارقة<br><input type="checkbox"/> عجمان<br><input type="checkbox"/> رأس الخيمة<br><input type="checkbox"/> أم القيوين<br><input type="checkbox"/> الفجيرة                                                                                                                                              |
| * المدينة:                                                        | <input type="checkbox"/> _____                                                                                                                                                                                                                                                                                                                                                                        |
| الوزن:                                                            | <input type="checkbox"/> _____                                                                                                                                                                                                                                                                                                                                                                        |
| الطول:                                                            | <input type="checkbox"/> _____                                                                                                                                                                                                                                                                                                                                                                        |
| * الحالة الاجتماعية:                                              | <input type="checkbox"/> أعزب /عزباء<br><input type="checkbox"/> متزوج / متزوجة<br><input type="checkbox"/> مطلق / مطلقة<br><input type="checkbox"/> أرمل /أرملة<br><input type="checkbox"/> غيره _____                                                                                                                                                                                               |
| * هل كنتِ (أو زوجتك) حاملاً من قبل؟ (إذا كان السؤال مطابق لحالتك) | <input type="checkbox"/> لا<br><input type="checkbox"/> إذا كانت الإجابة نعم، فكم عدد حالات الحمل؟<br><input type="checkbox"/> لا ينطبق                                                                                                                                                                                                                                                               |
| * اسم الكلية:                                                     | <input type="checkbox"/> كلية الإدارة والاقتصاد<br><input type="checkbox"/> كلية العلوم الإنسانية والاجتماعية<br><input type="checkbox"/> كلية تقنية المعلومات<br><input type="checkbox"/> كلية الهندسة<br><input type="checkbox"/> كلية التربية<br><input type="checkbox"/> كلية القانون<br><input type="checkbox"/> كلية الزراعة والطب البيطري<br><input type="checkbox"/> كلية الطب والعلوم الصحية |
| القسم :                                                           | <input type="checkbox"/> _____                                                                                                                                                                                                                                                                                                                                                                        |
| * البرنامج؟                                                       | <input type="checkbox"/> الجامعية<br><input type="checkbox"/> دراسات عليا                                                                                                                                                                                                                                                                                                                             |
| * هل تعمل حالياً؟                                                 | <input type="checkbox"/> نعم<br><input type="checkbox"/> لا                                                                                                                                                                                                                                                                                                                                           |

|                                                                                                                                                                                                                                                                                                                                                                                                                                   |                                                                                                    |
|-----------------------------------------------------------------------------------------------------------------------------------------------------------------------------------------------------------------------------------------------------------------------------------------------------------------------------------------------------------------------------------------------------------------------------------|----------------------------------------------------------------------------------------------------|
| <input type="checkbox"/> اعمل في القطاع الصحي<br><input type="checkbox"/> اعمل خارج القطاع الصحي<br><input type="checkbox"/> لا ينطبق                                                                                                                                                                                                                                                                                             | *إذا كنت تعمل حالياً، فأين تعمل؟                                                                   |
| <input type="checkbox"/> لا<br><input type="checkbox"/> نعم _____                                                                                                                                                                                                                                                                                                                                                                 | *هل يوجد أحد في منزلك يعمل في المجال الصحي؟                                                        |
| <input type="checkbox"/> لا<br><input type="checkbox"/> نعم _____                                                                                                                                                                                                                                                                                                                                                                 | هل يوجد شخص في المنزل الذي تعيش فيه مصاب بمرض السكري؟ حدد*                                         |
| <input type="checkbox"/> لا<br><input type="checkbox"/> نعم                                                                                                                                                                                                                                                                                                                                                                       | *هل انت مصاب بأمراض مزمنة؟                                                                         |
| <input type="checkbox"/> مقدمات السكري<br><input type="checkbox"/> داء السكري<br><input type="checkbox"/> ارتفاع ضغط الدم<br><input type="checkbox"/> ارتفاع الدهون/الكوليسترول<br><input type="checkbox"/> أمراض القلب<br><input type="checkbox"/> جلطة دماغية<br><input type="checkbox"/> مرض الغدة الدرقية<br><input type="checkbox"/> مرض السمنة<br><input type="checkbox"/> غيرها _____<br><input type="checkbox"/> لا ينطبق | *إذا كانت الإجابة نعم، (يمكنك اختيار أكثر من إجابة)                                                |
| <input type="checkbox"/> نعم<br><input type="checkbox"/> لا                                                                                                                                                                                                                                                                                                                                                                       | * (الحوامل) هل سمعت من قبل بما يسمى (مرض السكري عند                                                |
| <input type="checkbox"/> نعم<br><input type="checkbox"/> لا<br><input type="checkbox"/> لا ينطبق                                                                                                                                                                                                                                                                                                                                  | *هل تعرف أحد أصيب بمرض سكر الحمل؟                                                                  |
| <input type="checkbox"/> نعم<br><input type="checkbox"/> لا<br><input type="checkbox"/> لا ينطبق                                                                                                                                                                                                                                                                                                                                  | *هل أصبت (أو زوجتك) بسكري الحمل أثناء أي من حالات حملها؟                                           |
| القسم الثاني: المعرفة بمرض السكري عند الحوامل                                                                                                                                                                                                                                                                                                                                                                                     |                                                                                                    |
| <input type="checkbox"/> نعم [1 point]<br><input type="checkbox"/> لا<br><input type="checkbox"/> لا أعلم                                                                                                                                                                                                                                                                                                                         | *هل تعتقد ان زيادة مرات الحمل تزيد من فرصة الإصابة بسكر الحمل؟                                     |
| <input type="checkbox"/> نعم [1 point]<br><input type="checkbox"/> لا<br><input type="checkbox"/> لا أعلم                                                                                                                                                                                                                                                                                                                         | هل تعتقد أن النساء الذين سبق لهم وأن أصيبوا بسكر الحمل لديهم فرصة أكبر * للإصابة به مرة أخرى؟      |
| <input type="checkbox"/> نعم [1 point]<br><input type="checkbox"/> لا<br><input type="checkbox"/> لا أعلم                                                                                                                                                                                                                                                                                                                         | هل تعتقد أن زيادة الوزن/ السمنة قبل الحمل قد يساهم في حدوث سكر الحمل؟*                             |
| <input type="checkbox"/> نعم [1 point]<br><input type="checkbox"/> لا<br><input type="checkbox"/> لا أعلم                                                                                                                                                                                                                                                                                                                         | هل تعتقد/ تعتقد أن المرأة التي أحد أفراد عائلتها مصاب بالسكري لديها فرصة أكبر للإصابة بسكر الحمل؟* |
| <input type="checkbox"/> نعم [1 point]<br><input type="checkbox"/> لا<br><input type="checkbox"/> لا أعلم                                                                                                                                                                                                                                                                                                                         | هل تعتقد أن سرعة زيادة الوزن أثناء الحمل قد يساهم في الإصابة بسكر * الحمل؟                         |
| <input type="checkbox"/> 22- 12 الاسبوع<br><input type="checkbox"/> 28 – 24 الاسبوع [1 point]<br><input type="checkbox"/> 35 – 23 الاسبوع                                                                                                                                                                                                                                                                                         | ما هو الوقت المعتاد لتشخيص سكر الحمل في حال عدم وجود عوامل الخطر * المتعلقة بوجوده؟                |

|                                                                                                                                                                                                                                                                                                                                                                                                                                       |                                                                                  |
|---------------------------------------------------------------------------------------------------------------------------------------------------------------------------------------------------------------------------------------------------------------------------------------------------------------------------------------------------------------------------------------------------------------------------------------|----------------------------------------------------------------------------------|
| <input type="checkbox"/> لا أعلم                                                                                                                                                                                                                                                                                                                                                                                                      |                                                                                  |
| <input type="checkbox"/> تحليل البول<br><input type="checkbox"/> تحليل الدم<br><input type="checkbox"/> تحليل الدم بعد شرب محلول الجلوكوز<br>[1 point]<br><input type="checkbox"/> لا أعلم                                                                                                                                                                                                                                            | * ما هو الاختبار (التحليل) المستخدم لتشخيص سكر الحمل؟                            |
| <input type="checkbox"/> [1 point] الحماية والتمارين الرياضية<br><input type="checkbox"/> OR حقن الأنسولين<br><input type="checkbox"/> [1 point] أدوية السكر عن طريق الفم<br><input type="checkbox"/> لا أعلم                                                                                                                                                                                                                         | ما هي الخطة العلاجية التي تستخدم للمصابة بسكر الحمل؟ (يمكن اختيار أكثر من إجابة) |
| <input type="checkbox"/> [1 point] عادةً يختفي بعد الولادة<br><input type="checkbox"/> من الممكن أن يؤثر على الطفل المولود<br><input type="checkbox"/> [1 point] إذا لم يتم علاج سكر الحمل<br><input type="checkbox"/> من الممكن أن المرأة المصابة بسكر الحمل أن تصاب بداء السكري من النوع الثاني مستقبلاً<br><input type="checkbox"/> لا أعلم                                                                                        | * سكر الحمل .....؟ (يمكن اختيار أكثر من إجابة)                                   |
| <input type="checkbox"/> المستشفى<br><input type="checkbox"/> المدرسة<br><input type="checkbox"/> مكان العمل<br><input type="checkbox"/> التلفزيون<br><input type="checkbox"/> الجريدة / المجلة<br><input type="checkbox"/> وسائل التواصل الاجتماعي<br><input type="checkbox"/> مصادر أخرى من الإنترنت<br><input type="checkbox"/> العائلة/ الأصدقاء<br><input type="checkbox"/> الجيران<br><input type="checkbox"/> غيرها. حدد _____ | * من أين سمعت (مصدر المعلومات) عن سكر الحمل عند الحوامل؟                         |
