# Supplementary material for: Gestational Diabetes Mellitus: A Cross-Sectional Survey of Its Knowledge and Associated Factors among United Arab Emirates University Students
Source: MDPI journal article supplement (doi:10.3390/ijerph19148381), 2022-07-08
Supplement: s1 [file s1]

### Supplementary table S1 showing percentage missing data for the 735 eligible students

| Variables                                        | N* = 735 (%missing) |
|--------------------------------------------------|---------------------|
| Age(years)                                       | 735 (0%)            |
| Gender                                           | 735 (0%)            |
| Program                                          | 735 (0%)            |
| Marital status                                   | 735 (0%)            |
| Working status                                   | 735 (0%)            |
| Anyone in your home working in the Health Sector | 735 (0%)            |
| Family history of diabetes                       | 735 (0%)            |
| Weight(kg) (among 735 total)                     | 698 (5.0%)          |
| Height(m) (among 735 total)                      | 684 (6.9%)          |
| BMI (kg/m <sup>2</sup> ) (among 735 total)       | 677 (7.9%)          |
| Outcome (ever heard and never heard of GDM)      | 735 (0%)            |

\*Total number of participants who responded to a question

### Missing data for 480 students included in the GDM knowledge level analysis

| Variables                                        | N* = 480 (%missing) |
|--------------------------------------------------|---------------------|
| Age(years)                                       | 480 (0%)            |
| Gender                                           | 480 (0%)            |
| Program                                          | 480 (0%)            |
| Marital status                                   | 480 (0%)            |
| Working status                                   | 480 (0%)            |
| Anyone in your home working in the Health Sector | 480 (0%)            |
| Family history of diabetes                       | 480 (0%)            |
| Knowing someone who had GDM                      | 480 (0%)            |
| Weight(kg) (among 480 total)                     | 457 (4.8%)          |
| Height(m) (among 480 total)                      | 452 (5.8%)          |
| BMI (kg/m <sup>2</sup> ) (among 480 total)       | 449 (6.5%)          |
| Outcome (poor, fair, good)                       | 480 (0%)            |

\*Total number of participants who responded to a question
