# Supplementary material for: Gestational Diabetes Mellitus: A Cross-Sectional Survey of Its Knowledge and Associated Factors among United Arab Emirates University Students
Source: MDPI journal article supplement (doi:10.3390/ijerph19148381), 2022-07-08
Supplement: s1 [file s1]

**Supplementary Table S2. Sociodemographic characteristics of 735 eligible students and comparisons between those who “Ever heard of GDM” and those who “Never heard of GDM”**

| Sociodemographic Characteristics                 | Total population N* | n (%) / Median (IQR) | Ever heard of GDM n=535 (72.8%) | Never heard of GDM n=200 (27.2%) | Pvalue <sup>a</sup> |
|--------------------------------------------------|---------------------|----------------------|---------------------------------|----------------------------------|---------------------|
| Age(years)                                       | 735                 | 21.0 (3.0)           | 21.0 (3.0)                      | 20.0 (3.0)                       | 0.797               |
| Weight (kg)                                      | 698                 | 61.0 (21.4)          | 60.0 (20.0)                     | 64.0 (21.0)                      | 0.020               |
| Height (m)                                       | 684                 | 1.60 (0.09)          | 1.60 (0.09)                     | 1.63 (0.14)                      | <0.001              |
| BMI (kg/m <sup>2</sup> )                         | 677                 | 23.3 (6.5)           | 23.1 (6.9)                      | 23.5 (6.0)                       | 0.966               |
| Gender                                           | 735                 |                      |                                 |                                  |                     |
| Male                                             |                     | 155 (21.1)           | 73 (47.1)                       | 82 (52.9)                        |                     |
| Female                                           |                     | 580 (78.9)           | 462 (79.7)                      | 118 (20.3)                       | <0.001              |
| Program                                          | 735                 |                      |                                 |                                  |                     |
| Undergraduate                                    |                     | 605 (82.3)           | 441 (72.9)                      | 164 (27.1)                       |                     |
| Postgraduate                                     |                     | 130 (17.7)           | 94 (72.3)                       | 36 (27.7)                        | 0.892               |
| Marital status                                   | 735                 |                      |                                 |                                  |                     |
| Single                                           |                     | 629 (85.6)           | 450 (71.5)                      | 179 (28.5)                       |                     |
| Married                                          |                     | 106 (14.4)           | 85 (80.2)                       | 21 (19.8)                        | 0.064               |
| Working status                                   | 735                 |                      |                                 |                                  |                     |
| Yes                                              |                     | 89 (12.1)            | 61 (68.5)                       | 28 (31.5)                        |                     |
| No                                               |                     | 646 (87.9)           | 474 (73.4)                      | 172 (26.6)                       | 0.337               |
| Anyone in your home working in the Health Sector | 735                 |                      |                                 |                                  |                     |
| Yes                                              |                     | 140 (19.1)           | 100 (71.4)                      | 40 (28.6)                        |                     |
| No                                               |                     | 595 (80.9)           | 435 (73.1)                      | 160 (26.9)                       | 0.688               |
| Family history of diabetes                       | 735                 |                      |                                 |                                  |                     |
| Yes                                              |                     | 369 (50.2)           | 283 (76.7)                      | 86 (23.3)                        |                     |
| No                                               |                     | 366 (49.8)           | 252 (68.9)                      | 114 (31.2)                       | 0.017               |
| BMI category                                     | 677                 |                      |                                 |                                  |                     |
| Normal weight                                    |                     | 339 (50.1)           | 251 (74.0)                      | 88 (26.0)                        |                     |
| Underweight                                      |                     | 96 (14.2)            | 72 (75.0)                       | 24 (25.0)                        |                     |
| Overweight                                       |                     | 153 (22.6)           | 107 (69.9)                      | 46 (30.1)                        |                     |
| Obesity                                          |                     | 89 (13.1)            | 69 (77.5)                       | 20 (22.5)                        | 0.594               |

Data were expressed as median (IQR- Interquartile range) or n (%) unless stated otherwise. \*=Total number of eligible students who responded to a particular question. <sup>a</sup>=Chi square used for categorical variables and Mann-Whitney U test for continuous variables.
