# Supplementary material for: Gestational Diabetes Mellitus: A Cross-Sectional Survey of Its Knowledge and Associated Factors among United Arab Emirates University Students
Source: MDPI journal article supplement (doi:10.3390/ijerph19148381), 2022-07-08
Supplement: s1 [file s1]

**Supplementary Table S4. Simple and multiple regression analysis between GDM knowledge status (ever heard of GDM and never heard of GDM) and students' characteristics (N=735)**

| Sociodemographic Characteristics  |        | Unadjusted* OR (95% CI)          | Adjusted OR (95% CI) *           |
|-----------------------------------|--------|----------------------------------|----------------------------------|
| <b>Gender</b>                     | Male   | ref                              |                                  |
|                                   | Female | 4.398 (3.024-6.397) <sup>a</sup> | 3.444 (1.944-6.102) <sup>a</sup> |
| <b>Family history of diabetes</b> | No     | ref                              |                                  |
|                                   | Yes    | 1.489 (1.073-2.065) <sup>a</sup> | 1.311 (0.913-1.882)              |
| <b>Weight (kg)</b>                |        | 0.989 (0.980-0.999) <sup>a</sup> | 1.010 (0.997-1.023)              |
| <b>Height (m)</b>                 |        | 0.002 (0.000-0.019) <sup>a</sup> | 0.079 (0.003-2.270)              |

\*=Ordinal logistic regression used. <sup>a</sup>=statistically significant after regression (p<0.05).
