# Supplementary material for: Gestational Diabetes Mellitus: A Cross-Sectional Survey of Its Knowledge and Associated Factors among United Arab Emirates University Students
Source: Int J Environ Res Public Health. 2022 Jul 8;19(14):8381. doi: 10.3390/ijerph19148381 (PMC9321366; doi:10.3390/ijerph19148381)
Supplement: Supplementary file 1 [file ijerph-19-08381-s001.zip]

Archive with 6 entries (6 files):
- Supplementary Figure S1 - Questionnaire (Arabic and English) GDM knowledge study.pdf
- Supplementary Figure S2 - Study population -GDM knowledge study.pdf
- Supplementary Table S1 - missing data_GDM knowledge study.pdf
- Supplementary Table S2 - Sociodemographic characteristics of 902 eligible students.pdf
- Supplementary Table S3 -  GDM knowledge points frequency.pdf
- Supplementary Table S4 - regression analysis of GDM knowledge status for 902 eligible students.pdf
