# Supplementary figures and images for: Gestational Diabetes Mellitus: A Cross-Sectional Survey of Its Knowledge and Associated Factors among United Arab Emirates University Students
Source: MDPI journal article supplement (doi:10.3390/ijerph19148381), 2022-07-08

## Supplementary Figure S2 showing study population

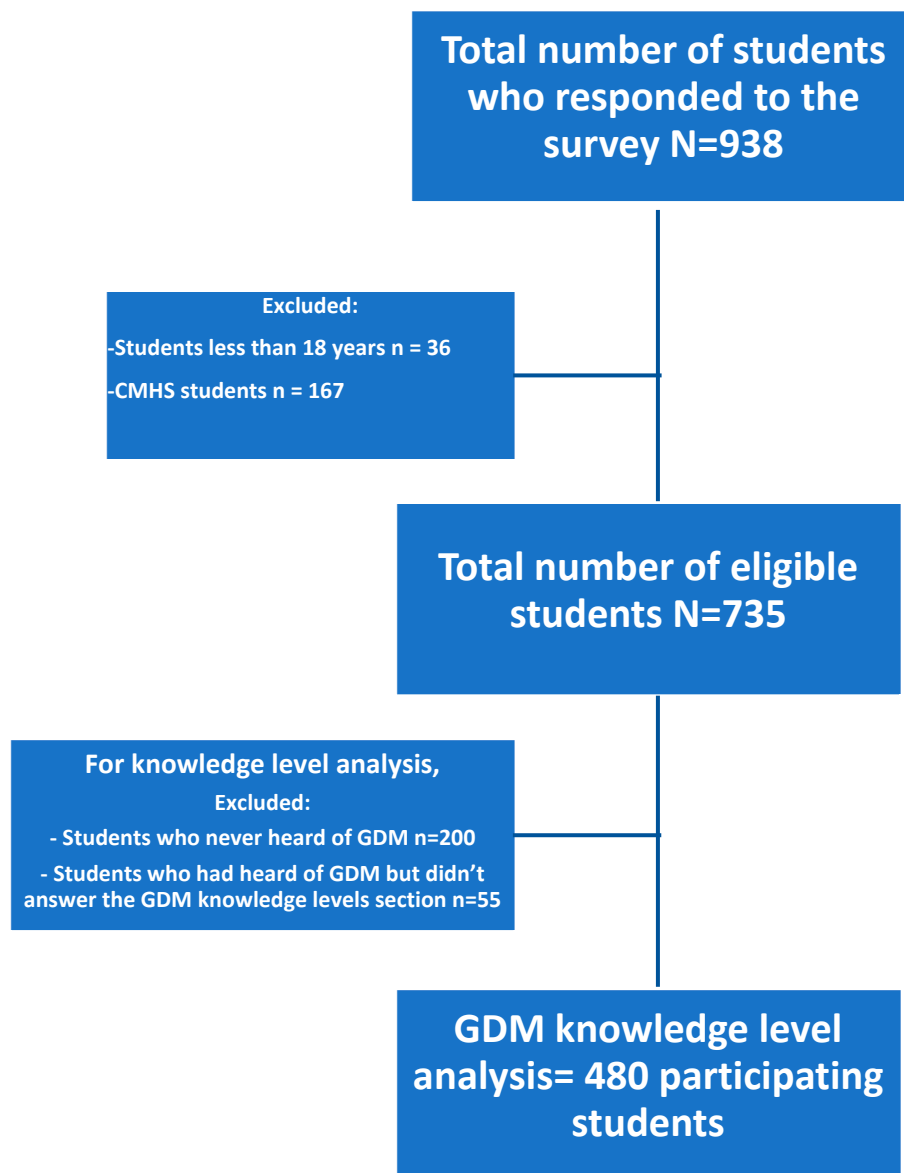

Supplement: s1 [file s1]
